# Supplementary material
Source: Springer Nature journal article supplement (https://www.springermedizin.de/resource/supplementary/12936_2012_2582_MOESM2_ESM.pdf/9543294)
Supplement: MOESM2 [file 9543294]

Additional file 2: The composition of the solvent used to produce the Accudenz gradient greatly affects sporozoite recovery.

*Plasmodium falciparum* sporozoites

| <b>Solvent</b> | <b>% Recovery<br/>Trial 1</b> | <b>% Recovery<br/>Trial 2</b> | <b>Average</b> |
|----------------|-------------------------------|-------------------------------|----------------|
| Water          | 77.8                          | 93.2                          | 85.5           |
| 0.5x PBS       | 27.4                          | 24.2                          | 25.8           |
| 1.0x PBS       | 22.4                          | 14.4                          | 18.4           |
| 2.0X PBS       | 1.4                           | 0.9                           | 1.15           |
